# Supplementary material for: In search of non-conventional surface oxidic motifs of Cu on Au(111)
Source: Royal Society of Chemistry journal article supplement (doi:10.1039/c5cp07932b), 2016-01-01
Supplement: c5cp07932b1.pdf [file c5cp07932b1.pdf]

**Supporting Information:**

**In search of non-conventional surface oxidic motifs of Cu on Au(111)**

Taehun Lee, Yonghyuk Lee, Kisung Kang, and Aloysius Soon<sup>a)</sup>

*Global E<sup>3</sup> Institute and Department of Materials Science and Engineering,  
Yonsei University, Seoul 120-749, Korea*

(Dated: 22 December 2015)

---

<sup>a)</sup>Corresponding author. E-mail: aloysius.soon@yonsei.ac.kr

TABLE S1. Average adsorption energies of oxygen in various oxidic structures (i.e. O/Cu(111),<sup>1,2</sup> O/Au(111),<sup>3</sup> and O/Cu on Au(111) at the corresponding surface oxygen coverage,  $\Theta_{\text{O}}$ .

| System                                      | Oxidic structures                           | $\Theta_{\text{O}}$ (ML) | $E^{\text{ad}}$ (eV/O atom) |
|---------------------------------------------|---------------------------------------------|--------------------------|-----------------------------|
| Cu-O/Au(111)                                | <i>p2</i>                                   | 0.500                    | -1.94                       |
|                                             | <i>p2</i> +Cu <sub>F</sub>                  | 0.500                    | -1.72                       |
|                                             | <i>p2</i> +O <sub>F</sub>                   | 0.750                    | -1.28                       |
|                                             | <i>p2s</i>                                  | 0.500                    | -1.96                       |
|                                             | <i>p2s</i> +Cu <sub>F</sub>                 | 0.500                    | -1.77                       |
|                                             | <i>p2s</i> +Cu <sub>F</sub> -O <sub>L</sub> | 0.417                    | -1.73                       |
|                                             | <i>p2s</i> -O <sub>L</sub>                  | 0.417                    | -1.86                       |
|                                             | <i>p2(6q6)</i>                              | 0.316                    | -1.86                       |
|                                             | <i>p2(6q6)</i> +O <sub>3</sub>              | 0.474                    | -1.79                       |
|                                             | <i>p2(6q6)</i> -Cu <sub>3</sub>             | 0.316                    | -1.86                       |
|                                             | <i>p2(6q6)</i> -Cu <sub>6</sub>             | 0.316                    | -1.59                       |
|                                             | <i>p4</i>                                   | 0.375                    | -1.62                       |
|                                             | <i>p4</i> +O <sub>F</sub>                   | 0.438                    | -1.46                       |
|                                             | <i>p4</i> +O <sub>HF</sub>                  | 0.500                    | -1.28                       |
|                                             | <i>p4</i> +O <sub>BBB</sub>                 | 0.563                    | -1.14                       |
|                                             | <i>p4</i> -OCu <sub>3</sub>                 | 0.313                    | -1.81                       |
|                                             | O/Cu(111) <sup>1</sup>                      | <i>p2</i>                | 0.500                       |
| <i>p2</i> +Cu <sub>F</sub>                  |                                             | 0.500                    | -1.68                       |
| <i>p2</i> +O <sub>F</sub>                   |                                             | 0.750                    | -1.77                       |
| <i>p4</i>                                   |                                             | 0.375                    | -2.14                       |
| <i>p4</i> +Cu <sub>T</sub>                  |                                             | 0.375                    | -1.99                       |
| <i>p4</i> +Cu <sub>H</sub>                  |                                             | 0.375                    | -2.10                       |
| <i>p4</i> +Cu <sub>FH</sub>                 |                                             | 0.375                    | -2.04                       |
| <i>p4</i> +Cu <sub>HT</sub>                 |                                             | 0.375                    | -1.93                       |
| <i>p4</i> +Cu <sub>T</sub> +O <sub>F</sub>  |                                             | 0.438                    | -1.99                       |
| <i>p4</i> +O <sub>F</sub>                   |                                             | 0.438                    | -2.10                       |
| <i>p4</i> +O <sub>H</sub>                   |                                             | 0.438                    | -2.09                       |
| <i>p4</i> +O <sub>FH</sub>                  |                                             | 0.500                    | -2.05                       |
| <i>p4</i> -OCu <sub>3</sub>                 |                                             | 0.313                    | -2.15                       |
| <i>p4</i> -(OCu <sub>3</sub> ) <sub>2</sub> |                                             | 0.250                    | -2.09                       |
| “8”-structure <sup>2</sup>                  |                                             | 0.500                    | -1.79                       |
| O/Au(111) <sup>3</sup>                      |                                             | 0.063                    | -0.75                       |
|                                             |                                             | 0.111                    | -0.66                       |
|                                             | Chemisorbed                                 | 0.250                    | -0.64                       |
|                                             | overlayers                                  | 0.500                    | -0.30                       |
|                                             |                                             | 0.750                    | 0.16                        |
|                                             | 1.000                                       | 0.62                     |                             |

## REFERENCES

- <sup>1</sup>A. Soon, M. Todorova, B. Delley, C. Stampfl. Oxygen Adsorption and Stability of Surface Oxides on Cu(111): A First-principles Investigation. *Phys. Rev. B* **2006**, *73*, 165424.
- <sup>2</sup>N. A. Richter, C.-E. Kim, C. Stampfl, A. Soon. Re-visiting the O/Cu(111) System-When Metastable Surface Oxides Could Become an Issue! *Phys. Chem. Chem. Phys.* **2014**, *16*, 26735.
- <sup>3</sup>H. Shi, C. Stampfl. First-principles Investigations of the Structure and Stability of Oxygen Adsorption and Surface Oxide Formation at Au(111). *Phys. Rev. B* **2007**, *76*, 075327.
